# Supplementary material for: PtCu bimetallic alloy nanotubes with porous surface for oxygen reduction reaction
Source: Royal Society of Chemistry journal article supplement (doi:10.1039/c6ra12415a), 2016-01-01
Supplement: c6ra12415a1.pdf [file c6ra12415a1.pdf]

# PtCu Bimetallic Alloy Nanotubes with Porous Surface for Oxygen Reduction Reaction

*Shaofang Fu, Chengzhou Zhu,\* Qiurong Shi, Dan Du, Yuehe Lin\**

The School of Mechanical and Materials Engineering, Washington State University,  
Pullman, WA 99164, USA.

Email: [chengzhou.zhu@wsu.edu](mailto:chengzhou.zhu@wsu.edu) and [yuehe.lin@wsu.edu](mailto:yuehe.lin@wsu.edu)

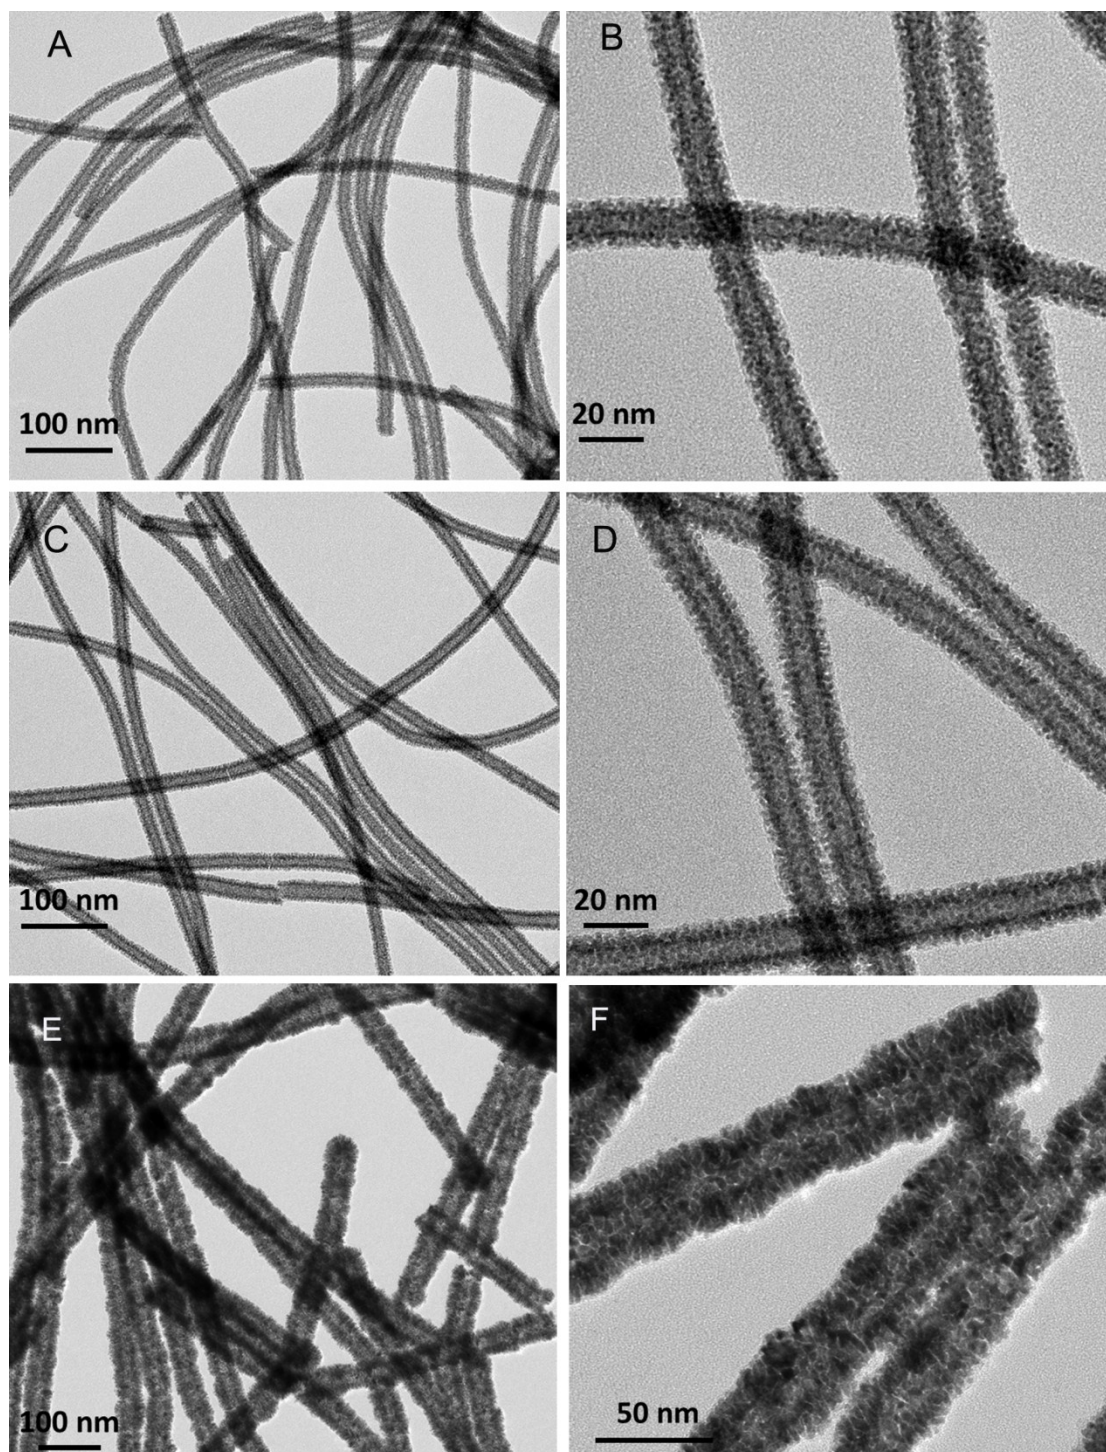

Figure S1. TEM images of Pt<sub>63</sub>Cu<sub>37</sub> (A, B), Pt<sub>82</sub>Cu<sub>18</sub> (C, D) BANTs, and Pt NTs (E, F).

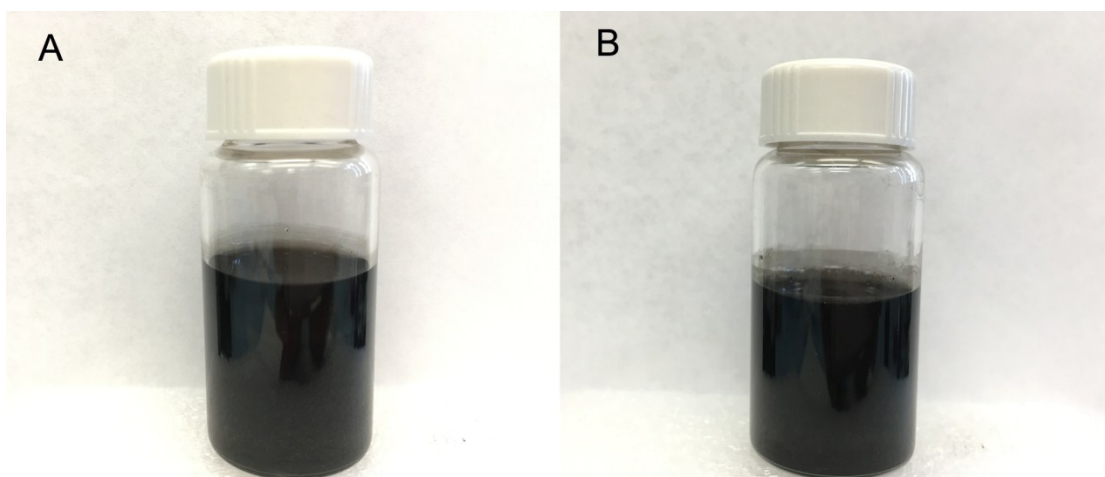

Figure S2. Digital pictures of PtCu BANTs dispersed in water (A) and ethanol (B).

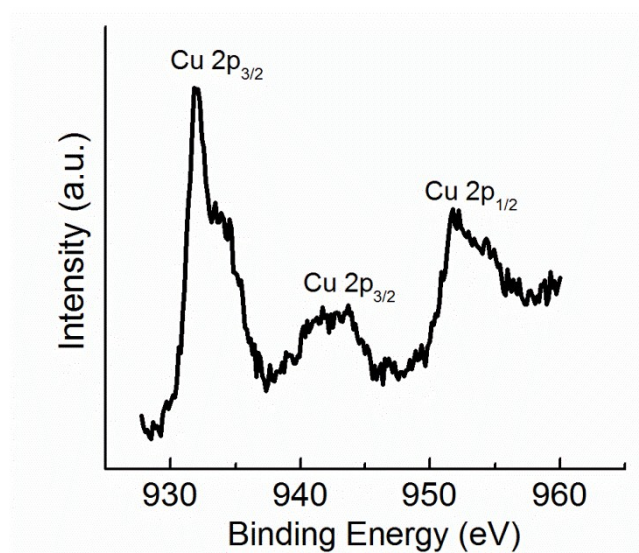

Figure S3. High resolution XPS spectrum of Cu in Pt<sub>76</sub>Cu<sub>24</sub> BANTs.

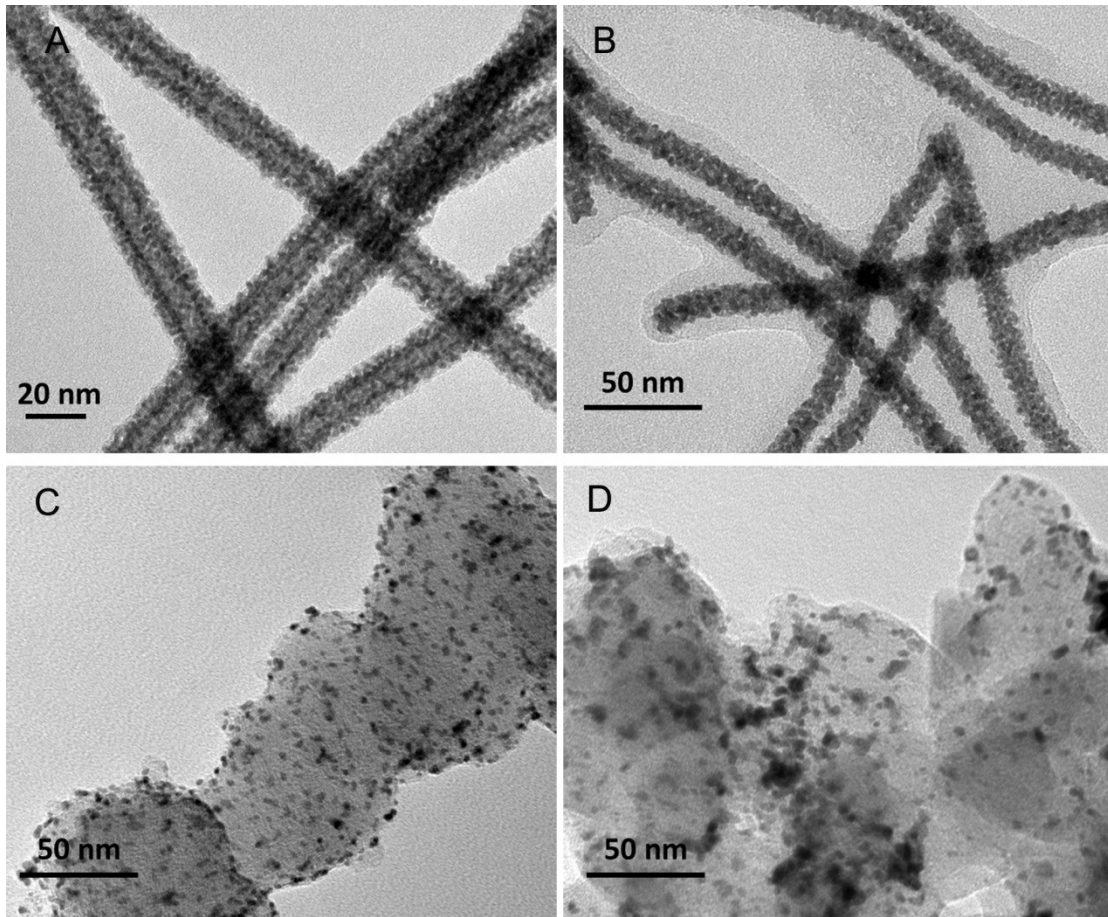

Figure S4. TEM images of  $\text{Pt}_{76}\text{Cu}_{24}$  BANTs before (A) and after (B) ADT. TEM images of commercial Pt/C catalyst before (C) and after (D) ADT.

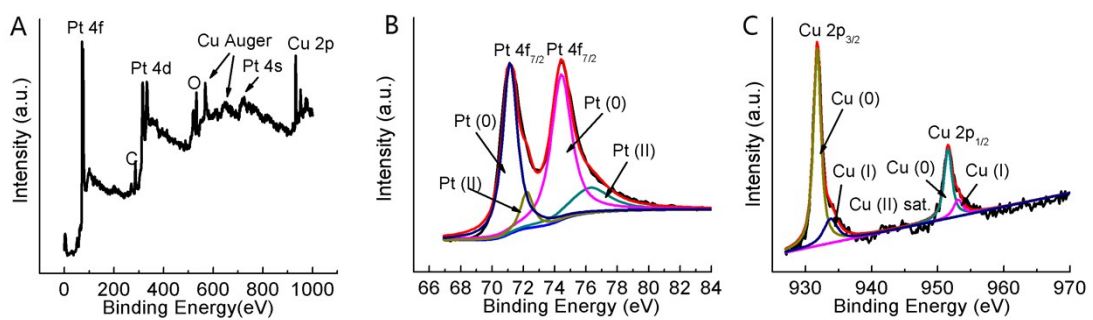

Figure S5. XPS spectrum, high resolution XPS spectra of Pt and Cu in  $\text{Pt}_{76}\text{Cu}_{24}$  BANTs after ADT.
